# Supplementary material for: Inactivation of beta1 integrin induces proteasomal degradation of Myc oncoproteins
Source: PubMed Central journal article supplement (PMC6697639; doi:10.18632/oncotarget.27131), 2019-08-13
Supplement: oncotarget-10-4960-s001.pdf [file oncotarget-10-4960-s001.pdf]

## Inactivation of beta1 integrin induces proteasomal degradation of Myc oncoproteins

### SUPPLEMENTARY MATERIALS

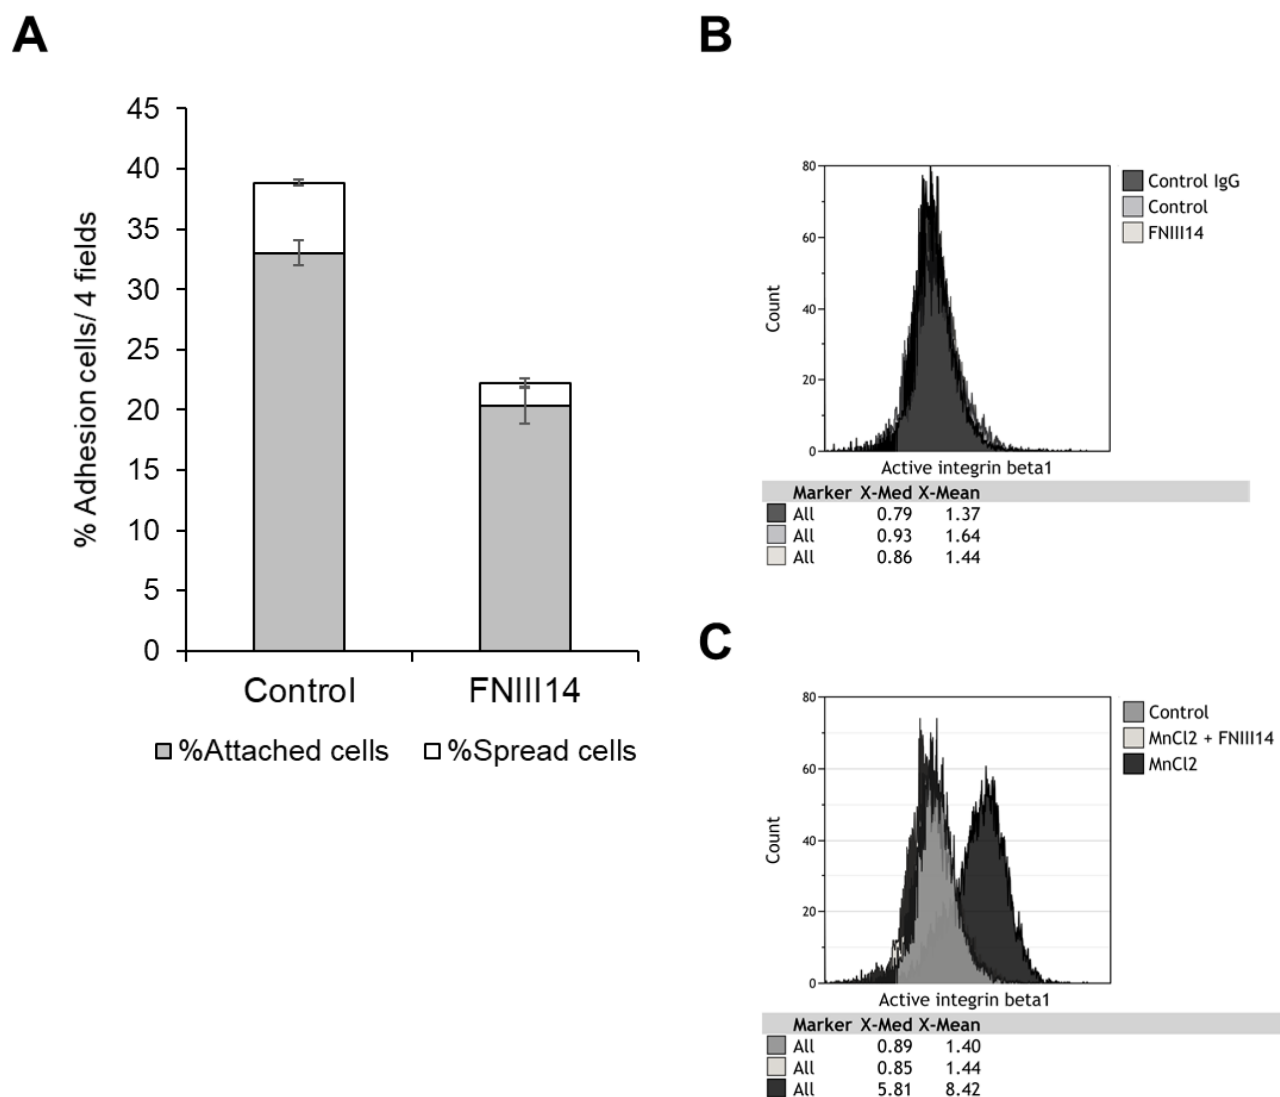

**Supplementary Figure 1: FNIII14 inactivates  $\beta$ 1- integrins in IMR-32 cells.** (A) Effect of FNIII14 on cell-adhesion to FN. (B and C) Effect of FNIII14 on activating state of  $\beta$ 1-integrin detected by Flow cytometric analysis. IMR-32 cells were treated with or without FNIII14 (50  $\mu$ g/mL) for 45 min (B). IMR-32 cells were treated with  $MnCl_2$  (1 mM) in the presence or absence of FNIII14 (50  $\mu$ g/mL) (C).

**A**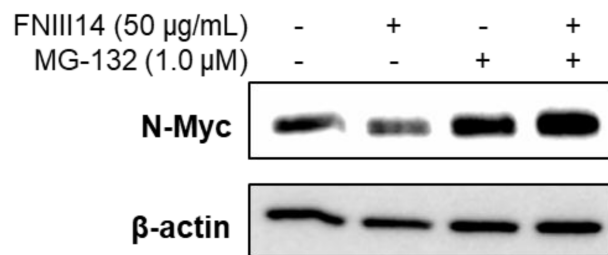**B**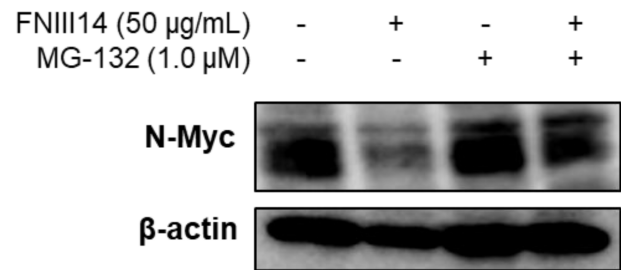

**Supplementary Figure 2:** Effect of FNIII14 on the expression of N-Myc protein in NB-1 cells (**A**) and KELLY cells (**B**). Cells adhered on fibronectin substrate were stimulated with FNIII14 (50 µg/mL) for 6 days in the presence and absence of MG-132 (1 µM). Cell lysates were subjected to immunoblotting.
